# Supplementary material for: Secretome-Wide Analysis of Lysine Acetylation in Fusarium oxysporum f. sp. lycopersici Provides Novel Insights Into Infection-Related Proteins
Source: Front Microbiol. 2020 Sep 8;11:559440. doi: 10.3389/fmicb.2020.559440 (PMC7506082; doi:10.3389/fmicb.2020.559440)
Supplement: Supplementary file 8 [file Table_8.XLSX]

## Sheet: Sheet1
Species	Ec		Pi		Mgr		Af1		An		Hc8		Ci		Bc		Bg		Cg		Ss		Tr		Fg		Fol		Fs		Fv		Mo		Pa		Nc		Cas		Sc		Sp		Lb		Sl7		Pc
	[Bacteria] Escherichia coli K12 PROTEINS		[Oomycetes] Phytophthora infestans 1 PROTEINS		[Fungi] Mycosphaerella graminicola 2 PROTEINS		[Fungi] Aspergillus fumigatus A1163 PROTEINS		[Fungi] Aspergillus nidulans 4 PROTEINS		[Fungi] Histoplasma capsulatum H88 2 PROTEINS		[Fungi] Coccidioides immitis RS 2 PROTEINS		[Fungi] Botrytis cinerea 1A PROTEINS		[Fungi] Blumeria graminis 14102010 PROTEINS		[Fungi] Colletotrichum graminicola M1.001 PROTEINS		[Fungi] Sclerotinia sclerotiorum PROTEINS		[Fungi] Trichoderma reesei PROTEINS		[Fungi] Fusarium graminearum 3 PROTEINS		[Fungi] Fusarium oxysporum PROTEINS		[Fungi] Fusarium solani 2 PROTEINS		[Fungi] Fusarium verticillioides 3 PROTEINS		[Fungi] Magnaporthe oryzae 8 PROTEINS		[Fungi] Podospora anserina 3 PROTEINS		[Fungi] Neurospora crassa 10 PROTEINS		[Fungi] Candida albicans SC5314 21 PROTEINS		[Fungi] Saccharomyces cerevisiae S288C 2010 PROTEINS		[Fungi] Schizosaccharomyces pombe 2007 PROTEINS		[Fungi] Laccaria bicolor PROTEINS		[Fungi] Serpula lacrymans S7.3 PROTEINS		[Fungi] Phanerochaete chrysosporium 2.1 PROTEINS
FOXG_08688T0	None		None		None		None		None		None		None		None		None		None		None		None		None		FOXG_08688	1e-135	None		FVEG_05978	1e-122	None		None		None		None		None		None		None		None		None
FOXG_10672T0	None		None		None		None		None		None		None		None		None		None		None		None		None		FOXG_10672	1e-119	fgenesh1_pg.sca_79_chr7_4_0000017	2e-69	FVEG_09306	1e-115	None		None		None		None		None		None		None		None		None
FOXG_14507T0	None		None		None		None		None		None		None		None		None		None		None		None		None		FOXG_14507	1e-113	fgenesh1_pg.sca_22_chr7_11_0000055	1e-61	FVEG_13327	1e-106	None		None		None		None		None		None		None		None		None
FOXG_05199T0	None		None		None		None		None		None		None		None		None		None		None		36905	1e-27	FGSG_10206.3	2e-74	FOXG_05199	2e-94	fgeneshN1_pm.sca_5_chr5_3_0000013	5e-60	None		None		None		None		None		None		None		None		None		None
FOXG_13743T0	None		None		None		None		None		None		None		None		None		GLRG_00945T0	5e-76	SS1G_08018.1	2e-49	29338	3e-83	FGSG_04471.3	1e-115	FOXG_13743	1e-129	estExt_Genewise1.C_sca_11_chr8_3_00429	1e-115	FVEG_11156	1e-121	MGG_00210T0	5e-62	Pa_5_690	1e-63	NCU07105T0	2e-61	None		None		None		None		None		None
FOXG_11745T0	None		None		None		None		None		HCEG_06130	7e-30	CIMG_04438.2	2e-28	None		None		None		None		31260	2e-67	FGSG_03911.3	3e-90	FOXG_11745	1e-104	e_gw1.33.121.1	8e-87	FVEG_10054	5e-60	MGG_01367T0	4e-58	Pa_2_8170	6e-68	NCU06650T0	3e-48	None		None		None		None		None		None
FOXG_11456T0	None		None		None		EDP53356.1	2e-33	ANID_09377	1e-29	HCEG_09309	5e-30	None		BC1G_01872	3e-12	bgh02693_polypeptide	3e-09	GLRG_05667T0	5e-58	SS1G_12262.1	4e-11	41864	2e-75	FGSG_04176.3	1e-133	FOXG_11456	0	estExt_fgenesh1_pg.C_sca_20_chr6_4_00131	1e-112	FVEG_10347	1e-159	MGG_11750T0	4e-60	Pa_1_5270	2e-50	NCU00811T0	1e-53	None		None		None		None		None		None
FOXG_13854T0	None		None		estExt_Genewise1Plus.C_chr_90135	2e-56	EDP51780.1	2e-51	ANID_02330	7e-39	None		None		BC1G_05076	5e-37	None		GLRG_06009T0	1e-74	SS1G_07526.1	8e-37	10300	3e-80	FGSG_04380.3	1e-163	FOXG_13854	0	e_gw1.11.595.1	1e-153	FVEG_11267	0	MGG_00194T0	9e-06	Pa_6_11060	9e-72	NCU05143T0	2e-06	None		None		None		None		None		None
FOXG_06166T0	None		None		e_gw1.10.586.1	0	EDP52822.1	0	ANID_09156	0	None		None		None		None		GLRG_05463T0	0	None		None		FGSG_09475.3	0	FOXG_06166	0	estExt_Genewise1Plus.C_sca_18_chr2_1_01927	0	FVEG_04017	0	MGG_10669T0	0	Pa_4_4820	0	NCU09788T0	0	None		None		None		e_gwh1.6.107.1	1e-154	fgenesh1_pg.8_#_210	1e-130	e_gww2.8.111.1
FOXG_13566T0	None		None		e_gw1.5.942.1	1e-175	EDP53734.1	0	ANID_07402	1e-179	HCEG_02398	1e-160	CIMG_01553.2	1e-168	BC1G_04151	0	None		GLRG_05210T0	1e-165	SS1G_10617.1	0	28313	1e-174	FGSG_11326.3	0	FOXG_13566	0	fgenesh1_pm.sca_3_chr4_2_0000128	1e-147	FVEG_13829	0	MGG_01096T0	1e-166	Pa_3_3770	1e-139	NCU01517T0	0	orf19.1719	1e-54	YIL099W	2e-50	SPBC14C8.05c	3e-67	eu2.Lbscf0003g07350	1e-158	estExt_fgenesh1_kg.C_81134	1e-155	e_gww2.8.126.1
FOXG_05950T0	NP_415890.1	2e-10	PITG_11420	1e-10	fgenesh1_pm.C_chr_1000512	1e-74	EDP56832.1	1e-80	ANID_00933	6e-83	HCEG_08778	3e-67	CIMG_01102.2	6e-68	BC1G_00409	1e-72	bgh05640_mRNA_polypeptide	8e-66	GLRG_08809T0	1e-104	SS1G_07663.1	2e-70	11893	1e-107	FGSG_09289.3	0	FOXG_05950	0	gw1.18.2281.1	1e-140	FVEG_03816	0	MGG_00592T0	2e-72	Pa_4_7400	1e-86	NCU05974T0	3e-95	orf19.2706	7e-63	YGR189C	7e-65	SPAPB15E9.01c	7e-10	estExt_fgenesh2_pg.C_120215	3e-21	fgenesh1_kg.2_#_818_#_662_3_CFOT_CFPN	7e-23	e_gwh2.7.306.1
FOXG_08810T0	None		None		fgenesh1_pm.C_chr_1000512	9e-66	EDP56832.1	6e-71	ANID_00933	4e-72	HCEG_08778	7e-65	CIMG_09291.2	5e-61	BC1G_02932	4e-64	bgh05640_mRNA_polypeptide	9e-64	GLRG_08809T0	8e-88	SS1G_07663.1	3e-65	11893	1e-105	FGSG_05757.3	1e-135	FOXG_08810	1e-164	estExt_Genewise1Plus.C_sca_18_chr2_1_00209	1e-123	FVEG_05864	1e-157	MGG_09918T0	9e-66	Pa_4_7400	2e-81	NCU05974T0	3e-87	orf19.2706	6e-53	YGR189C	7e-54	None		estExt_fgenesh2_pg.C_120215	3e-26	fgenesh1_kg.2_#_818_#_662_3_CFOT_CFPN	9e-25	e_gwh2.7.306.1
FOXG_04049T0	None		PITG_20764	5e-19	e_gw1.7.690.1	1e-112	EDP49928.1	1e-178	ANID_02648	1e-170	HCEG_04176	6e-78	CIMG_06273.2	1e-67	BC1G_05517	1e-116	None		GLRG_06381T0	0	SS1G_02119.1	1e-138	20202	1e-142	FGSG_07838.3	0	FOXG_04049	0	fgenesh1_pm.sca_28_chr13_5_0000086	0	FVEG_07157	0	MGG_02650T0	6e-86	Pa_2_3710	1e-147	NCU04108T0	1e-152	None		None		None		eu2.Lbscf0017g03090	2e-60	estExt_Genewise1Plus.C_90894	3e-71	fgenesh1_pg.C_scaffold_11000383
FOXG_03994T0	None		PITG_09387	3e-22	estExt_fgenesh1_pm.C_chr_20238	1e-101	EDP52067.1	1e-112	ANID_06888	8e-95	HCEG_06802	9e-76	CIMG_00311.2	4e-75	BC1G_03579	6e-92	bghP000494	3e-86	GLRG_08583T0	1e-138	SS1G_03181.1	9e-96	41841	1e-123	FGSG_07775.3	0	FOXG_03994	0	e_gw1.27.288.1	1e-145	FVEG_11865	0	MGG_02898T0	1e-120	Pa_1_800	1e-112	NCU00994T0	1e-121	orf19.1891	2e-26	YPL154C	6e-26	None		fgenesh3_pg.C_scaffold_5000510	8e-29	Genemark.8464_g	3e-43	gwh2.2.481.1
FOXG_04115T0	NP_415349.1	2e-23	PITG_07039	7e-77	fgenesh1_pm.C_chr_9000268	6e-10	None		None		HCEG_06623	2e-06	CIMG_09159.2	6e-06	BC1G_15602	1e-06	bgh03288_polypeptide	1e-07	GLRG_05824T0	1e-123	None		41090	1e-110	FGSG_02189.3	1e-156	FOXG_04115	0	e_gw1.26.330.1	1e-139	FVEG_07217	0	MGG_03346T0	1e-122	Pa_5_680	1e-126	NCU09718T0	1e-111	None		None		None		eu2.Lbscf0005g03760	2e-13	estExt_fgenesh1_kg.C_60256	3e-12	None
FOXG_01527T0	NP_414917.1	2e-39	PITG_18078	5e-19	estExt_fgenesh1_pg.C_chr_20260	4e-69	EDP52355.1	0	ANID_02493	0	HCEG_06776	0	CIMG_00760.2	0	BC1G_06757	3e-17	bgh05251_polypeptide	6e-21	GLRG_04931T0	0	SS1G_03210.1	2e-17	31694	0	FGSG_07375.3	0	FOXG_01527	0	estExt_Genewise1Plus.C_sca_6_chr9_2_00206	0	FVEG_07878	0	MGG_04900T0	0	Pa_2_8640	0	NCU01376T0	0	orf19.984	2e-25	YDR481C	1e-18	SPBC14F5.13c	3e-14	e_gww1.8.34.1	0	None		None
FOXG_15373T0	None		None		gw1.1.2052.1	1e-131	EDP55411.1	1e-180	ANID_00509	1e-170	HCEG_02986	1e-15	CIMG_04761.2	3e-48	BC1G_00533	3e-38	bgh00739_polypeptide	2e-15	GLRG_11925T0	1e-145	SS1G_02128.1	1e-135	38315	0	FGSG_07569.3	0	FOXG_15373	0	estExt_fgeneshN1_kg.C_sca_27_chr9_1_00006	0	FVEG_12685	0	MGG_04534T0	3e-56	Pa_1_21450	1e-176	NCU05317T0	0	orf19.4984	4e-77	YDR371W	1e-15	None		e_gwh1.4.277.1	7e-20	estExt_fgenesh1_kg.C_20383	2e-17	gww2.6.319.1
FOXG_11632T0	None		PITG_03915	9e-26	fgenesh1_pm.C_chr_2000445	1e-172	EDP55345.1	0	ANID_12124	9e-40	HCEG_08642	1e-118	CIMG_05773.2	2e-65	BC1G_09997	0	bgh01190_polypeptide	6e-21	GLRG_08007T0	0	SS1G_05273.1	1e-140	40380	0	FGSG_04022.3	0	FOXG_11632	0	estExt_fgenesh1_pm.C_sca_37_chr6_2_00033	0	FVEG_10172	0	MGG_04756T0	1e-78	Pa_6_11400	0	NCU08719T0	0	orf19.3956	3e-23	YMR293C	3e-20	SPAC869.01	1e-173	gww1.2.239.1	5e-25	estExt_Genewise1Plus.C_51145	4e-78	fgenesh1_pg.C_scaffold_4000605
FOXG_04988T0	None		PITG_08094	6e-39	estExt_Genewise1Plus.C_chr_50590	4e-63	EDP52899.1	4e-61	ANID_00395	1e-117	HCEG_04915	1e-58	CIMG_07626.2	3e-59	BC1G_11823	3e-40	bgh02315_polypeptide	3e-58	GLRG_09364T0	1e-120	SS1G_04783.1	3e-59	10270	6e-91	FGSG_10414.3	1e-169	FOXG_04988	0	estExt_fgenesh1_pm.C_sca_82_chr10_2_00131	1e-179	FVEG_03140	1e-128	MGG_15739T0	6e-61	Pa_3_11040	3e-56	NCU00951T0	9e-59	orf19.3590	1e-63	YBR011C	5e-68	SPAC23C11.05	3e-62	eu2.Lbscf0001g05910	4e-59	fgenesh1_kg.21_#_56_#_3433_2_CFOT_CFPN	1e-52	e_gww2.13.300.1
FOXG_13226T0	None		None		None		EDP48331.1	4e-21	ANID_02336	2e-23	HCEG_07170	0	CIMG_00518.2	1e-178	BC1G_00879	2e-18	None		None		SS1G_00272.1	4e-17	46338	0	FGSG_11236.3	0	FOXG_13226	0	fgenesh1_pg.sca_41_chr12_2_0000080	0	FVEG_12283	0	None		None		None		None		None		None		None		None		None
FOXG_12372T0	None		PITG_01495	6e-07	e_gw1.11.890.1	8e-73	EDP52627.1	7e-79	ANID_11897	2e-74	HCEG_02983	7e-65	CIMG_04981.2	3e-79	BC1G_11698	2e-64	None		GLRG_01146T0	1e-52	SS1G_00044.1	8e-52	13733	8e-96	FGSG_03379.3	1e-130	FOXG_12372	1e-161	e_gw1.9.731.1	1e-114	FVEG_10919	1e-158	MGG_05342T0	4e-57	Pa_2_4050	6e-56	None		orf19.3926	7e-64	YPL123C	1e-52	None		e_gwh1.14.49.1	2e-61	estExt_fgenesh1_kg.C_210023	3e-67	e_gwh2.13.194.1
FOXG_02417T0	None		None		estExt_Genewise1Plus.C_chr_30203	8e-78	EDP53594.1	3e-56	ANID_03918	5e-55	HCEG_04918	4e-54	CIMG_07629.2	1e-65	BC1G_07770	1e-63	bgh06047_mRNA_polypeptide	2e-12	GLRG_07173T0	1e-163	SS1G_07901.1	1e-60	45755	1e-168	FGSG_06545.3	0	FOXG_02417	0	fgenesh1_pm.sca_19_chr4_3_0000061	0	FVEG_05594	0	MGG_08758T0	1e-153	Pa_5_12440	1e-151	NCU04430T0	2e-65	orf19.3591	1e-63	YBR286W	9e-57	None		gww1.1.320.1	9e-09	e_gw1.3.58.1	4e-11	fgenesh1_pg.C_scaffold_9000392
FOXG_00754T0	None		PITG_18100	2e-06	estExt_fgenesh1_pm.C_chr_60335	6e-48	EDP49408.1	8e-30	ANID_07871	4e-25	HCEG_08768	4e-36	CIMG_01112.2	6e-32	BC1G_02492	8e-51	bgh02974_polypeptide	3e-41	GLRG_07364T0	8e-74	SS1G_01262.1	4e-44	9174	3e-70	FGSG_00314.3	1e-164	FOXG_00754	0	estExt_fgenesh1_pg.C_sca_1_chr1_3_00681	1e-143	FVEG_00759	0	MGG_08577T0	7e-60	Pa_3_6630	5e-49	NCU01720T0	8e-39	None		YGR279C	9e-08	SPAC13G6.10c	5e-22	gwh1.1.609.1	2e-19	estExt_fgenesh1_pg.C_110110	2e-21	fgenesh1_pg.C_scaffold_12000050
FOXG_16943T0	None		PITG_15980	2e-21	e_gw1.3.746.1	2e-63	EDP53632.1	3e-38	ANID_10150	1e-37	HCEG_02588	4e-38	CIMG_06979.2	9e-37	BC1G_11898	2e-61	bgh06777_mRNA_polypeptide	3e-67	GLRG_09366T0	2e-34	SS1G_12930.1	4e-59	21984	2e-32	FGSG_03529.3	1e-159	FOXG_16943	0	estExt_Genewise1Plus.C_sca_58_chr7_9_00026	1e-146	FVEG_13739	1e-178	MGG_04689T0	1e-32	Pa_7_1340	1e-33	NCU06381T0	7e-34	orf19.4565	3e-36	YGR282C	2e-44	SPAC26H5.08c	5e-54	fgenesh3_pg.C_scaffold_4000452	4e-15	fgenesh1_pm.7_#_220	2e-13	e_gww2.4.293.1
FOXG_05795T0	None		None		None		EDP53916.1	3e-08	ANID_04564	3e-08	HCEG_06810	2e-53	CIMG_01821.2	4e-08	BC1G_02702	3e-57	None		GLRG_06995T0	1e-104	SS1G_03276.1	1e-22	34706	8e-06	FGSG_09142.3	1e-155	FOXG_05795	0	e_gw1.82.226.1	1e-117	FVEG_03660	1e-180	MGG_14917T0	1e-76	Pa_3_5510	4e-81	NCU00622T0	7e-08	None		None		SPCC1223.06	9e-09	None		estExt_Genewise1.C_10589	7e-07	fgenesh1_pg.C_scaffold_11000146
FOXG_16906T0	None		PITG_21468	5e-45	gw1.2.760.1	3e-55	EDP56135.1	8e-38	ANID_08977	3e-63	HCEG_04315	2e-55	CIMG_06231.2	6e-37	BC1G_08757	5e-47	None		GLRG_01210T0	5e-50	SS1G_04903.1	2e-53	19245	1e-131	FGSG_03816.3	0	FOXG_16906	0	e_gw1.9.410.1	0	FVEG_12891	0	MGG_05984T0	1e-146	Pa_1_22160	1e-124	NCU01866T0	1e-140	None		None		None		e_gww1.8.322.1	8e-82	fgenesh1_kg.15_#_250_#_1529_1_CFOT_CFPN	3e-66	fgenesh1_pg.C_scaffold_14000195
FOXG_06218T0	None		None		gw1.6.148.1	4e-55	EDP56958.1	2e-38	ANID_08435	2e-40	HCEG_04865	2e-61	CIMG_07583.2	9e-59	BC1G_00048	3e-68	bgh01832_polypeptide	2e-63	GLRG_08813T0	1e-104	SS1G_04725.1	1e-63	44887	1e-146	FGSG_09522.3	0	FOXG_06218	0	estExt_Genewise1Plus.C_sca_18_chr2_1_02014	0	FVEG_04066	0	MGG_11545T0	7e-80	Pa_4_7510	1e-80	NCU05978T0	2e-62	None		None		None		estExt_GeneWisePlus_human.C_300044	4e-48	Genemark.3615_g	3e-20	None
FOXG_13474T0	None		PITG_20786	3e-19	estExt_Genewise1Plus.C_chr_81247	4e-34	EDP52820.1	7e-27	ANID_05944	1e-169	HCEG_01987	1e-34	CIMG_02232.2	7e-26	BC1G_00750	3e-40	bgh00682_polypeptide	1e-23	GLRG_08221T0	0	SS1G_11930.1	3e-38	35711	1e-32	FGSG_11386.3	0	FOXG_13474	0	fgenesh1_pg.sca_40_chr12_1_0000078	0	FVEG_13906	0	MGG_02987T0	0	Pa_5_12060	5e-29	NCU06573T0	1e-32	None		None		SPCC417.12	4e-15	estExt_GeneWisePlus_human.C_30670	1e-26	estExt_Genewise1Plus.C_270060	1e-58	gww2.3.202.1
FOXG_09102T0	None		None		estExt_Genewise1Plus.C_chr_10638	1e-124	EDP53594.1	1e-143	ANID_08445	1e-142	HCEG_04918	1e-129	CIMG_07629.2	1e-138	BC1G_07770	1e-106	None		GLRG_07172T0	1e-158	SS1G_07901.1	1e-98	13992	4e-95	FGSG_04936.3	0	FOXG_09102	0	fgenesh1_pg.sca_17_chr8_1_0000268	0	FVEG_06695	0	MGG_01863T0	3e-98	Pa_3_11080	0	NCU04430T0	0	orf19.3591	1e-86	YBR286W	2e-80	None		e_gww1.4.290.1	2e-08	e_gw1.10.988.1	2e-08	e_gwh2.2.510.1
FOXG_01059T0	None		PITG_19169	2e-18	estExt_fgenesh1_pm.C_chr_10128	0	EDP48198.1	0	ANID_09067	0	HCEG_05003	0	CIMG_07708.2	0	BC1G_00660	1e-136	bghP006445	0	GLRG_00635T0	0	SS1G_05782.1	0	44316	0	FGSG_00728.3	0	FOXG_01059	0	estExt_fgenesh1_pm.C_sca_1_chr1_3_00518	0	FVEG_00454	0	MGG_01326T0	0	Pa_1_11060	0	NCU03125T0	0	orf19.1750	1e-18	YMR173W	2e-17	SPAC23H3.15c	2e-10	eu2.Lbscf0012g00840	1e-104	estExt_fgenesh1_pm.C_20438	1e-115	gwh2.7.82.1
FOXG_13658T0	None		PITG_18076	3e-20	estExt_Genewise1Plus.C_chr_10950	3e-59	EDP56292.1	4e-91	ANID_01218	2e-83	HCEG_04397	2e-69	CIMG_05617.2	7e-79	BC1G_10164	6e-91	bgh03740_polypeptide	1e-74	GLRG_06582T0	1e-126	SS1G_13777.1	5e-89	34838	1e-126	FGSG_04572.3	0	FOXG_13658	0	fgenesh1_pg.sca_11_chr8_3_0000303	0	FVEG_11077	0	None		Pa_6_10220	4e-48	None		orf19.7596	4e-40	YKL128C	3e-25	None		e_gww1.61.62.1	1e-35	estExt_fgenesh1_kg.C_41586	8e-46	fgenesh1_pg.C_scaffold_12000102
FOXG_16920T0	NP_418028.1	5e-26	None		fgenesh1_pm.C_chr_7000061	5e-88	EDP50387.1	1e-106	ANID_03388	0	HCEG_02399	3e-90	CIMG_04544.2	2e-64	BC1G_03893	3e-86	bghP000061000002001	4e-14	GLRG_01576T0	1e-84	SS1G_00249.1	2e-85	33668	0	FGSG_03842.3	0	FOXG_16920	0	e_gw1.36.176.1	0	FVEG_12938	0	MGG_10209T0	1e-177	Pa_1_12690	2e-89	NCU09805T0	2e-93	orf19.3982	3e-13	YGR287C	2e-13	SPAC25H1.09	5e-76	eu2.Lbscf0057g00320	4e-87	estExt_Genewise1Plus.C_160234	2e-83	gww2.9.190.1
[truncated: 31 more columns]
